# Supplementary material for: Navigating Mental Health Care: Latine Perceptions, Barriers, and Pathways to Engagement
Source: Research Square preprint supplement (doi:10.21203/rs.3.rs-7723932/v1), 2025-12-22
Supplement: Supplementary file 1 [file 25f98d1989857f54543c63a4.docx]

**INFORMED CONSENT**

**UNIVERSITY OF CALIFORNIA, SAN FRANCISCO**

**CONSENT TO PARTICIPATE IN A RESEARCH STUDY**

| Date |  |
| --- | --- |
| Study Title | Latinx Depression Care During COVID-19: Needs, Challenges, and Attitudes in the SF Bay Area |
| Principal Investigators | Dr. X  Dr. Y |
| Contact Information | Email: [XX]  Email: [YY] |

Research studies include only people who choose to take part. Please take your time to make your decision about participating and discuss your decision with your family or friends if you wish. If you have any questions, you may ask the researchers.

**Introduction**

- The purpose of this study is to learn more about how people are feeling as the COVID-19 pandemic has gone on, people’s opinions on depression and depression care, and what may make it easy or difficult for someone to connect to mental health resources during the COVID-19 pandemic.
- The people in charge of the study are Drs. X and Y who work at the University of California, San Francisco (UCSF) in the Department of Internal Medicine.

**Why is this study being done?**

- This study will help us understand mental health needs, what affects access to mental health resources, and what may help patients access mental health resources during and after the shelter-in-place order for COVID-19 if they need them.

**Who is paying for this study?**

- This study is being paid for with a grant from the National Institute on Minority Health and Health Disparities (NIMHD) and the Health Resources and Services Administration.

**Why am I being asked to be in this study?**

- You are being asked to be in this follow-up interview study because you completed the first interview in the first Latinx Depression Care During COVID-19: Needs, Challenges, and Attitudes in the SF Bay Area Study.

**How many people will take part in this study?**

- 5 to 10 people will take part in the study.

**What will happen if I take part in this research study?**

- You will be interviewed for 45 to 60 minutes in a private room in the [XX] Clinic at ZSFG, or in your own home over Zoom, a video conferencing app.
- We will make a sound recording of this conversation. After the interview, we will transcribe what’s on the recording and will remove any mention of names. The sound recordings will be destroyed after the transcripts are verified.
- First, you will answer follow-up questions from the initial interview to make sure you are eligible to be in the study. This first part should take about 5 minutes.

Then, we will ask questions about your mood and how the COVID-19 pandemic has affected you since your first interview in the study. We will ask questions on how you care for your mental health, factors that have influenced your decision to use mental health resources or not, and thoughts on mental health in general. We will also ask questions regarding COVID-19 vaccines, such as current understanding, vaccination status, discussions surrounding vaccines in clinical and outside settings, and how these affect your mood. Lastly, you will be asked questions on resource accessibility to government assistance and support programs. This should take approximately 40 to 50 minutes.

**How long will I be in this study?**

- You will be in the study for one day during the 45-60 minute interview.

**Can I stop being in the study?**

- Yes. You can stop at any time. Just tell us.
- You can also choose not to answer any questions if you feel uncomfortable or do not wish to answer for any reason.
- We also may ask you to stop taking part in this study if we feel it is in your best interest or if you are unable to follow the study procedures.

**What are the risks or side effects of being in this study?**

- You may feel uneasy talking about your health, or you may feel overburdened by the questions. If you feel this way, you can choose not to answer some questions or stop being in the study at any time.
- There is always a risk of loss of privacy with any research study, but we will work very hard to keep all of your information private so no one else will have access to your information.
- In certain circumstances, we may be required by law to disclose information about you without your consent. We are legally and ethically required to report certain events to appropriate authorities, such as thoughts of hurting yourself or others, or suspicions of abuse.

**How will you keep my information private?**

- Only the people who work on the study will be able to see your personal information. This information will not be given to anyone else.
- We will keep your information locked away without your name on it.
- Study data will be stored in an electronic secure server and all audio files from interviews will be destroyed after we have transcribed and verified them.
- Very rarely, other people may need to look at your study information to make sure we are doing the study right, including:

-The University of California
-The National Institute on Minority Health and Health Disparities (NIMHD)

-The Health Resources and Services Administration

- In certain circumstances, we may be required by law to disclose information about you without your consent. We are legally and ethically required to report certain events to appropriate authorities, such as thoughts of hurting yourself or others, or suspicions of abuse.

**Are there benefits to taking part in this study?**

- There will be no direct benefit to you for being in this study.
- However, being in the study will help us understand what limits access to mental health services in the Latino population to then develop ways to improve utilization of these resources.

**What other choices do I have if I do not take part in this study?**

- You may choose to accept or refuse participation in this study.
- If you decide not to take part in this study, there will be no penalty to you. You will not lose any of your regular benefits, and you can still get your care from your clinic the way you usually do.

**How will my information be used?**

- Researchers will use your information to conduct this study.
- Information gathered during this research study will only be used for this study and will not be shared with other researchers.

**Are there any costs of taking part in this study?**

- There are no costs to you.

**Will I be paid for taking part in this study?**

- You will receive a $25 gift card for completing the second interview, for a total of $50 for completing both interviews.

**What are my rights if I take part in this study?**

- Taking part in this study is your choice.
- You may stop being in the study at any time.
- If you stop, you will not lose any of your regular benefits and it will not affect your medical care in any way.

What happens if I am injured because I took part in this study?

It is important that you tell your study doctor, Dr. X if you feel that you have been injured because of taking part in this study. You can tell the doctor in person or call her at (443)-845-5602.

**Treatment and Compensation for Injury:**  If you are injured as a result of being in this study, the University of California will provide necessary medical treatment.  The costs of the treatment may be billed to you or your insurer just like any other medical costs or covered by the University of California or the study sponsors the National Institute on Minority Health and Health Disparities (NIMHD) and the Health Resources and Services Administration depending on a number of factors. The University and the study sponsors do not normally provide any other form of compensation for injury. For further information about this, you may call the office of the Institutional Review Board at 415- 476-1814.

**Who can answer my questions about the study?**

- Dr. X, principal investigator, at (XXX)-XXX-XXXX.
- Dr. Y, principal investigator, at (XXX)-XXX-XXXX.
- Z, Project Analyst, at (XXX)-XXX-XXXX.
- ZZ, Assistant Project Coordinator, at (XXX)-XXX-XXXX.
- You may also contact UCSF’s Institutional Review Board, which is a group of people who review the research study to protect your rights: Phone:

415-476-1814, 8 am to 5 pm, Monday through Friday.

Address: Committee on Human Research, Box 0962 University of California, San Francisco (UCSF) San Francisco, CA 94143

**CONSENT**

**You have been given a copy of this consent form to keep.**

**You will be asked to sign a separate form authorizing access, use, creation, or disclosure of health information about you.**

PARTICIPATION IN RESEARCH IS VOLUNTARY.

This means that being in this study is your choice. You can stop being in this study at any time without any risks or loss of your regular benefits.

If you wish to be in this study, please sign below.

**Date Participant's Signature for Consent**

**Date Person Obtaining Consent**
