# Supplementary material for: Navigating Mental Health Care: Latine Perceptions, Barriers, and Pathways to Engagement
Source: Research Square preprint supplement (doi:10.21203/rs.3.rs-7723932/v1), 2025-12-22
Supplement: Supplementary file 2 [file 3c574ca2d5de55f3f1b3a940.docx]

| **No.** | **Item** | **Guide questions/description** | **Reported on Page No.** |
| --- | --- | --- | --- |
| **Domain 1: Research team and reflexivity** | | |  |
| *Personal characteristics* | | |  |
|  | Interviewer/facilitator | Which author/s conducted the interview or focus group? | Pg. 3 |
|  | Credentials | What were the researcher’s credentials? E.g. PhD, MD | Title Pg. |
|  | Occupation | What was their occupation at the time of the study? | Title Pg. |
|  | Gender | Was the researcher male or female? | Researcher preferred pronouns:  C.C – she/her  L.O.F. – she/her  E.T. – she/her  R.D.P – he/him  G.A.R. – she/her  M.E.G. – she/her |
|  | Experience and training | What experience or training did the researcher have? | Pg. 3 |
| *Relationship with Participants* | | |  |
|  | Relationship established | Was a relationship established prior to study commencement? | Pg. 3 |
|  | Participant knowledge of the interviewer | What did the participants know about the researcher? e.g. personal goals, reasons for doing the research | See Appendix 3. Informed Consent |
|  | Interviewer characteristics | What characteristics were reported about the interviewer/facilitator? e.g. Bias, assumptions, reasons and interests in the research topic | See Appendix 3. Informed Consent |
| **Domain 2: Study Design** | | |  |
| *Theoretical Framework* | | |  |
|  | Methodological orientation and Theory | What methodological orientation was stated to underpin the study? e.g. grounded theory, discourse analysis, ethnography, phenomenology, content analysis | Pg. 3 |
| *Participant Selection* | | |  |
|  | Sampling | How were participants selected? e.g. purposive, convenience, consecutive, snowball | Pg. 3 |
|  | Method of approach | How were participants approached? e.g. face-to-face, telephone, mail, email | Pg. 3 |
|  | Sample size | How many participants were in the study? | Pg. 4 |
|  | Non-participation | How many people refused to participate or dropped out? Reasons? | Pg. 4 |
| *Setting* | | |  |
|  | Setting of data collection | Where was the data collected? e.g. home, clinic, workplace | Pg. 3 |
|  | Presence of non-participants | Was anyone else present besides the participants and researchers? | Pg. 3 |
|  | Description of sample | What are the important characteristics of the sample? e.g. demographic data, date | Pg. 4 |
| Data collection | | |  |
|  | Interview guide | Were questions, prompts, guides provided by the authors? Was it pilot tested? | See Appendix 1. Interview Guide |
|  | Repeat interview | Were repeat interviews carried out? If yes, how many? | Pg. 3 & 4 |
|  | Audio/visual recording | Did the research use audio or visual recording to collect the data? | Pg. 3 |
|  | Field notes | Were field notes made during and/or after the interview or focus group? | N/A |
|  | Duration | What was the duration of the interviews or focus group? | Pg. 3 & 4 |
|  | Data saturation | Was data saturation discussed? | Pg. 4 |
|  | Transcripts returned | Were transcripts returned to participants for comment and/or correction? | N/A |
| **Domain 3: Analysis & Findings** | | |  |
| *Data Analysis* | | |  |
|  | Number of data coders | How many data coders coded the data? | Pg. 3-4 |
|  | Description of the coding tree | Did authors provide a description of the coding tree? | See Appendix 2. Targeted Codebook |
|  | Derivation of themes | Were themes identified in advance or derived from the data? | Pg. 3-4 |
|  | Software | What software, if applicable, was used to manage the data? | Pg. 4 |
|  | Participant checking | Did participants provide feedback on the findings? | N/A |
| *Reporting* | | |  |
|  | Quotations presented | Were participant quotations presented to illustrate the themes / findings? Was each quotation identified? e.g. participant number | Pg. 4-8 |
|  | Data and findings consistent | Was there consistency between the data presented and the findings? | Pg. 4-10 |
|  | Clarity of major themes | Were major themes clearly presented in the findings? | Pg. 4-10 |
|  | Clarity of minor themes | Is there a description of diverse cases or discussion of minor themes? | Pg. 4-8 |
