# Supplementary material for: Navigating Mental Health Care: Latine Perceptions, Barriers, and Pathways to Engagement
Source: Research Square preprint supplement (doi:10.21203/rs.3.rs-7723932/v1), 2025-12-22
Supplement: Supplementary file 3 [file 511700b23d2e7274d73f2560.docx]

| **Code Name** | **Code Definition** | **Code Group 1** | **Example** |
| --- | --- | --- | --- |
| AAA. Understanding symptoms | An individual does or does not: ~Acknowledging they have a depressive symptom ~Demonstrate an understanding of the impact of depression on an individuals' functioning and quality of life, specifically mood, sleep, the entire body, behavior, or cognition. | A. Understanding symptoms | Specific symptoms include: persistent feelings of sadness, loss of interest or pleasure in activities, changes in appetite or weight, sleep disturbances, fatigue, feelings of worthlessness or guilt, difficulty concentrating, and thoughts of death or suicide. |
| AAB. Health seeking behaviors | An indvidual does or does not: ~Understand the importance of seeking help for depressive symptoms. Make an effort to address their mental health needs, reduce stigma, and promote psychological well-being. ~Take action to seek information, support, treatment for mental health concerns, or engage in coping strategies. ~Gloss over or minimize uncomfortable emotions due to stigma or other unhealth coping strategies. *These are actions taken by the individual, and do not include interactions with the healthcare system. | B. Health seeking behaviors | An understanding of the potential causes and risk factors associated with depression, such as genetic predisposition, biochemical imbalances in the brain, life events, trauma, and other environmental factors. |
| AAC. Understanding diagnosis | An individual does or does not: ~Recognize that their symptoms meet the criteria for a depression diagnosis. ~Understand that depression is a treatable condition and understanding the various treatment options available, including psychotherapy, medication, *lifestyle modifications, and *self-care strategies. *These are suggestions/actions/treatments initiated by a clinican or someone in the healthcare system. | C. Understanding diagnosis | An individual misunderstands/understands they received a positive depression diagnosis An individual acknowledges that their depression diagnosis as true. |
| AAD. Understanding treatment | An individual does or does not: ~Understand the importance of seeking professional help for assessment, diagnosis, and treatment. ~Understand the healthcare system and the roles of various professionals within the care team, such as nurse practitioners, primary care physicians, psychologists, and counselors, who contribute to assessment, diagnosis, and treatment. ~Understand the rationale behind the necessity of their depression treatment, why a particular treatment approach was chosen, and the importance of adherence to the treatment plan for managing symptoms effectively. | D. Understanding treatment | An individual understands why they have been prescribed a medication, or referred to therapy for their depression. |
| AAE. Engaging in treatment | An individual does or does not: ~Mention meeting with their care team, regardless of the fequency of these meetings/appointments. ~Actively participate in and commit to the recommended therapeutic interventions or interventions prescribed for managing their mental health concerns. ~Demonstrate a willingness to explore and adopt strategies and techniques aimed at improving mental well-being, as well as seeking support from appropriate resources within the healthcare system and the community. *Remember, these are recommendations provided by clinician or care team. | E. Engaging in treatment | An individual attends therapy sessions, takes prescribed medications as directed, or actively collaborates with healthcare providers to address their depressive symptoms and achieve treatment goals. |
| AAF. Stigma | ~The implicit or explicity personal, cultural, or societal misconceptions, attitudes, beliefs, or stereotypes surrounding mental illness and depression, which can lead to the marginalization and mistreatment of affected individuals, hindering their access to appropriate care and support. | F. Stigma | Can be stigma from family, self, the media. Stigma which contributes to the reluctance of individuals to disclose their mental health issues or seek help due to fear of judgment or rejection from others. |
| AAG. Words used to describe depression/mood/symptoms | ~The language and terminology employed by the interviewer or participant to articulate and communicate experiences related to depression, mood, or depressive symptoms. | G. Words used to describe depression/mood/symptoms | Vocabulary or phrases used to express feelings of sadness, hopelessness, low energy, loss of interest, and other symptoms associated with depression. |
| AAH. Good quotes | This code captures any quotes that we would like to reference in manuscripts in the future. | H. Good quotes |  |
| AAI. Misc | ~This code captures anything that doesn't fit any of the other codes that have been created but stands out as valuable considering the focus and main ideas of the intended final writing product. We will filter these coded segments out at the end of the coding process. ~Also can be used when the reader believes there is a disconnect between the interviewer and participant, specifically due to the language being used by one person. | I. Misc |  |
| AAJ. Demographics | Comments which give a sense of the demographic characteristics of the participant and which could help provide context for the way in which they conceptualize mental health, manage their mental health, or engage with mental health care. ~Mention of additional non-mental health medical conditions that are explicitly connected to the participant's mental health. | J. Demographics | Comment about age, immigration status, living situation etc. which can provide valuable insights into factors influencing an individual's mental health. |
| AAK. Redact | Remove name or PHI | K. Redact |  |
