# Supplementary material for: Navigating Mental Health Care: Latine Perceptions, Barriers, and Pathways to Engagement
Source: Research Square preprint supplement (doi:10.21203/rs.3.rs-7723932/v1), 2025-12-22
Supplement: Supplementary file 4 [file 9866163d6de5ecd90a7fee49.docx]

**Appendix 4. Abbreviations List**

**ICD-10.** International Classification of Diseases, 10th Revision

**PCP.** Primary care physician

**HMO.** Health Maintenance Organization

**EHR.** Electronic Health Record

**PHQ-2.** Patient Health Questionnaire-2

**PHQ-9.** Patient Health Questionnaire-9

**CQR.** Consensual qualitative research

**COM-B.** Capability, Opportunity, Motivation for Behavior change

**DUI.** Driving under the influence
