# Supplementary material for: Navigating Mental Health Care: Latine Perceptions, Barriers, and Pathways to Engagement
Source: Research Square preprint supplement (doi:10.21203/rs.3.rs-7723932/v1), 2025-12-22
Supplement: Supplementary file 5 [file a42ccba0b459229e8fb5ecc2.docx]

**Sample Interview #1 Guide**

“Thank you for taking the time to sit down with me and talk about your experiences with mental health, your mood during the last couple months, how the COVID-19 pandemic and the shelter-in-place order has affected you, how you care for your mental health, factors that influence your decision to use mental health resources, and thoughts on mental health in general. You are being interviewed today because you screened positive for depressive symptoms at your last primary care clinic visit.”

“My name is [name], and I’m an [title]. Before we start our discussion, I wanted to make a couple of things clear.”

“First off, I want to emphasize that what we discuss in this interview will be kept confidential. When we write up this interview, your name will be removed, and any other details that could link you to your interview will be taken out or modified.”

“I also want to remind you that your participation in this interview is entirely voluntary. You can choose not to answer any question if you feel uncomfortable answering, and you can decide to end the interview at any point.”

“I don’t have any training in counseling or therapy. I’m having this conversation with you to contribute to research that I hope will lead to more people getting high quality mental healthcare. Together, I hope we can help people in general through the research process, but this conversation itself isn’t therapy.”

“Finally, I wanted to emphasize that as a researcher, I am a mandated reporter. When we’re talking about depression, suicide may come up. If you talk about any current thoughts of suicide, I will have to report that to the Principal Investigators, Drs. X and Y, who will call you to discuss this further. We will also let your primary care provider or clinic staff at the [XX] at ZSFG know that you are having thoughts about suicide so that they can reach out and help you with these thoughts. If we think you are at risk of harming yourself or others, we would call 911. The same applies to domestic abuse, elder abuse, and child abuse.”

“Do you have any questions before we get started?”

*NOTE: All of the domains will be covered, but the specific probes (a, b, i, ii) will vary. Since this is a semi-structured interview, the exact wording will vary in an attempt to create a natural conversation. Thus, the order of the questions may also vary slightly, but all interviews will be conducted with this guide for reference.*

# Background Information

1. What gender do you identify as?
   1. Male, female, other?
2. How old are you?
3. Where were you born?
   1. If born outside the US, how long have you been living in the US?
4. Where do you currently live now?
   1. Is it a house or an apartment?
5. Who do you live with?
   1. Parents? Siblings? Spouse? Children? Friends? Housemates?
6. What do you do for work? Are you an essential worker?
7. Does anyone else in your home work?
   1. If yes, what do they do for work?
8. When was your last primary care visit?
9. What are your thoughts on COVID-19?
   1. Worried about your own health or health of family and friends?
   2. Financial worries?
   3. Employment instability?
   4. Limited resources and services?
   5. Self-perceived risk of infection?
10. What steps, if any, do you take to protect yourself and/or others from COVID-19?
    1. Do you have a face mask?
       1. If yes, when do you use it?
          1. Every time you go outside, for certain tasks, don’t really wear it?
       2. If no, do you use a makeshift mask such as a cloth?
          1. If yes, when do you use it?
          2. Every time you go outside, for certain tasks, don’t really wear it?
       3. If you don’t use any protective covering over your nose and mouth, why is that?

# Mood

1. How has your mood been since your last primary care visit?
   1. How has your mood been since the shelter in place order went into effect?
   2. Is there anything you’re stressed, worried, or down about?
      1. Worried about your own health or health of family and friends?
      2. Financial worries? iii. Employment instability? iv. Limited resources and services?

v. Feelings of loneliness or sadness?

1. When you’re feeling stressed, worried, or down, what do you do?
   1. Do you talk to friends or family about these feelings?
   2. Have you accessed any resources such as counselors, therapists, or psychiatrists?
      1. If yes, what motivated you to see these resources?
      2. If no, were there any barriers that prevented you from accessing such resources such cost, transportation, language and/or, time availability?
2. I mentioned earlier that you screened positive for depressive symptoms at your last clinic visit. What are your thoughts on this diagnosis?
   1. What are your views on mental health/illness?
   2. What are your community’s views on mental health/illness?
   3. Do you feel like you need care for this?
      1. If yes, have you thought about seeking care? What services would you like for this issue?
         1. Do you feel like you have the knowledge and tools to seek care?
         2. Are there any barriers that would prevent you from seeking care such as cost, transportation, language, and/or time availability?
      2. If no, can you explain why you don’t need care?
      3. If you were feeling stressed or down in the future, who would you like to get help from? (e.g. family, friends, primary care doctor, therapist, etc)

# Experiences with Primary Care Provider

1. How comfortable do you feel discussing mental health issues with your primary care provider?
   1. What makes it easy or hard to talk to your primary care provider about these issues?
2. Do you feel like mental health is important to your primary care provider?
   1. Has he/she discussed the results of your depression screen? Did he/she diagnose you with depression? Did he/she discuss the diagnosis?

i. If yes, do you feel like there was enough time for you to understand the diagnosis and ask any questions?

- 1. Has he/she provided you with any resources for depression care?

1. Who else in your primary care clinic might you feel comfortable discussing your mental health with?

“That’s the end of the interview. Thank you so much for your time.”

“If something comes up or you have any additional questions, feel free to reach out to me by email at XX or by phone at (XXX)-XXX-XXXX.

**Sample Interview #2 Guide**

“Thank you for taking the time to sit down with our research team a few months ago to talk about your experiences with mental health, your mood, and how the COVID-19 pandemic and the shelter-in-place order affected you and your mental health. We were grateful that you shared the factors that influence your decision to use or not use mental health resources, and your thoughts on mental health in general. We were hoping to interview you again today to hear about how things have changed or stayed the same since the last interview.”

“My name is [name], and I’m an [title]. Before we start our discussion, I wanted to make a couple of things clear.”

“First off, I want to emphasize that what we discuss in this interview, like in the last interview, will be kept completely confidential. When we write up this interview, your name will be removed, and any other details that could link you to your interview will be taken out or modified.”

“I also want to remind you that your participation in this interview is entirely voluntary. You can choose not to answer any question if you feel uncomfortable answering, and you can decide to end the interview at any point.”

“I don’t have any training in counseling or therapy. I’m having this conversation with you to contribute to research that I hope will lead to more people getting high quality mental healthcare. Together, I hope we can help people in general through the research process, but this conversation itself isn’t therapy.”

“Finally, I wanted to emphasize that as a researcher, I am a mandated reporter. When we’re talking about depression, suicide may come up. If you talk about any current thoughts of suicide, I will have to report that to the Principal Investigators, Drs. X and Y, who will call you to discuss this further. We will also let your primary care provider or clinic staff at the [XX] at ZSFG know that you are having thoughts about suicide so that they can reach out and help you with these thoughts. If we think you are at risk of harming yourself or others, we would call 911. The same applies to domestic abuse, elder abuse, and child abuse.”

“Do you have any questions before we get started?”

*NOTE: All of the domains will be covered, but the specific probes (a, b, i, ii) will vary. Since this is a semi-structured interview, the exact wording will vary in an attempt to create a natural conversation. Thus, the order of the questions may also vary slightly, but all interviews will be conducted with this guide for reference.*

General Follow-up Questions:

- Do you currently live in the same place as when we conducted our initial interview? As a reminder, we conducted your first interview on X date.
- Do you currently live with anyone? How has your housing situation changed?
  - Parents? Siblings? Spouse? Children? Friends? Housemates?
- Have you been working since the last interview?
  - Are you an essential worker? o Do you work from home?
  - How has work changed for you in the last few months with relaxing of shelter in place orders?
- Does anyone else in your home work?
  - If yes, what do they do for work? (essential worker? Etc)
- What is your social support or social circle like? (e.g. family, friends, church, sports, etc)  When was your last primary care visit?
  - Was your visit in-person or did you talk to your doctor by phone or video? o Has your ability to access your PCP changed in the last few months?
    - Has it been more challenging or easier to access them since our first interview?

Pandemic Mood Questions:

- How has your mood been since the beginning of the pandemic? Has your mood changed in any way over time? If so, how has it changed and why?
- Has there been any significant changes in your mood or stress level since our last interview?
- Since our last interview, have you discussed mental health/ stressors or finding resources to address any of your causes of stress with your PCP, or others in your primary care clinic?
- If they mentioned resources in the first interview: have you continued to use these resources? Any new resources? Any new medications?
- Since our last interview have there been any new causes of stress in your life?
  - - Worried about your own health or health of family and friends?
    - Financial worries?
    - Employment instability?
    - Having enough food for yourself or your family?
    - Limited resources and services?
    - Feelings of loneliness or sadness?

COVID-19 Vaccine Questions:

- During the COVID-19 pandemic did you face any stressors related to the COVID-19 vaccine?
- Did you receive the vaccine?
  - If you received the vaccine, which type of vaccine did you receive?
- What factors contributed to your decision in taking the COVID-19 vaccine or not?
  - Transportation
  - Understanding/Knowledge of vaccine o Time/Availability o Accessibility
  - Opinions of friends and family
- What are your thoughts and feelings about the COVID-19 vaccine?
- How about the booster vaccines?
- Have you received a booster?
  - If not, how do you feel about getting a booster? Do you have concerns about the boosters? Prior side effects of vaccine?
- Did you and your PCP discuss the COVID-19 vaccine/booster?
  - If so, did you feel confident on your understanding of the vaccine after the discussing with your PCP?
  - Were there any barriers or facilitators that affected your ability to get a better understanding of the vaccine in discussion with your PCP?
    - Language barriers
    - Technical issues during discussion
- In your family, relationships, and social groups did you have any differences in opinion about the COVID-19 vaccine?
  - How did you navigate the discussion amongst these groups?
- If you have children under the age of 18:
  - Did you find it stressful to decide whether or not they should receive the COVID19 vaccine?
  - How have school closures impacted your family during the pandemic? o What about distance learning? o What about having enough childcare for your children during the pandemic?

Government Assistance Questions:

- In the first interview, you mentioned that you received X, Y or Z [if participants have previously mentioned any services]. Have you continued to receive these services?
- Vs. In the first interview, you mentioned that you had not received any government assistance for financial aid, food assistance, or any other programs. Has this changed since the last interview?
- If not, what were the barriers that prevented you from accessing or getting government support?
- If you have received government support were there any challenges during the process?
  - How has this government aid helped you? o Are you still using government supports? If so, which ones?

“That’s the end of the interview. Thank you so much for your time.”

“If something comes up or you have any additional questions, feel free to reach out to me by email at XX or by phone at (XXX) XXX-XXXX.
